# Supplementary material
Source: publisher figshare collection journal article supplement (https://sage.figshare.com/ndownloader/files/20366889)
Supplement: Supplementary file 1 [file 20366889]

Supplementary table. Mechanism of injury, anatomical location of injury, and imaging modalities used in 443 patients with penetrating trauma. The total number is more 443 since some patients had injuries in more than one body part.

\* impalement, miscellaneous penetrating sharp objects etc. Percentages in parentheses (%).

|                                          | Head & Face | Neck      | Torso     | Extremities |
|------------------------------------------|-------------|-----------|-----------|-------------|
| <b>MECHANISM OF INJURY</b>               | n (%)       | n (%)     | n (%)     | n (%)       |
| Shooting                                 | 8 (17.4)    | -         | 37 (13)   | 70 (40.5)   |
| Stabbing                                 | 24 (52.2)   | 28 (75.7) | 233 (83)  | 81 (46.8)   |
| Other*                                   | 12 (26.1)   | 7 (18.9)  | 11 (4)    | 19 (11)     |
| Missing                                  | 2 (4.3)     | 2 (5.4)   | 1 (0.3)   | 3 (1.7)     |
| <b>Total</b>                             | 46 (100)    | 37 (100)  | 282 (100) | 173 (100)   |
|                                          |             |           |           |             |
| <b>IMAGING PERFORMED BY MODALITY</b>     |             |           |           |             |
| Radiographs                              | -           | -         | 4 (1)     | 7 (4)       |
| Ultrasound                               | 2 (4.3)     | 3 (8.1)   | 1 (0.3)   | 23 (13.3)   |
| Radiographs and ultrasound               | -           | 1 (2.7)   | 17 (6)    | 10 (5.8)    |
| Radiographs, ultrasound and CT           | 15 (32.6)   | 9 (24.3)  | 193 (68)  | 52 (30.1)   |
| Ultrasound and CT                        | 5 (10.9)    | 6 (16.2)  | 18 (6)    | 17 (9.8)    |
| Radiographs and CT                       | 2 (4.3)     | 2 (5.4)   | 18 (6)    | 11 (6.4)    |
| CT and angiography                       | -           | 1 (2.7)   | 1 (0.3)   | 1 (0.6)     |
| CT                                       | -           | -         | 24 (8)    | 46 (26.6)   |
| Radiographs, ultrasound, CT, angiography | -           | -         | 4 (1)     | 4 (32.3)    |
| Ultrasound and angiography               | -           | -         | -         | 1 (0.6)     |
| Ultrasound, radiographs and angiography  | -           | -         | -         | 1 (0.6)     |
| Data not available                       | -           | -         | 2 (0.7)   | -           |
| <b>Total</b>                             | 46 (100)    | 37 (100)  | 282 (100) | 173 (100)   |
